# Supplementary material for: Circularly polarized luminescence and nonlinear optical harmonic generation based on chiral zinc halides
Source: Royal Society of Chemistry journal article supplement (doi:10.1039/d3cc01461d), 2023-01-01
Supplement: d3cc01461d1.pdf [file d3cc01461d1.pdf]

Supporting Information

## **Circularly polarized luminescence and nonlinear optical harmonic generation based on chiral zinc halides**

Xiao Han, Puxin Cheng, Wenqing Han, Rongchao Shi, Junjie Guan, Geng Li and Jialiang Xu\*

X. Han, P. Chen. Prof. J. Xu  
School of Materials Science and Engineering  
Smart Sensing Interdisciplinary Science Center  
Collaborative Innovation Center of Chemical Science and Engineering (Tianjin)  
Nankai University, Tongyan Road 38, Tianjin 300350, P. R. China  
E-mail: [jialiang.xu@nankai.edu.cn](mailto:jialiang.xu@nankai.edu.cn)

G. Li  
National Supercomputer Center in Tianjin, Tianjin 300457, China

### **Table of Contents**

|                                    |            |
|------------------------------------|------------|
| <b>Experimental Methods</b> .....  | <b>S1</b>  |
| <b>Supplementary Figures</b> ..... | <b>S2</b>  |
| <b>Supplementary Tables</b> .....  | <b>S7</b>  |
| <b>Reference</b> .....             | <b>S14</b> |

## Experimental Methods

**Materials.** Chemicals such as zinc oxide (ZnO, TCI, 99%), antimony trichloride (SbCl<sub>3</sub>, Macklin, 99.98%), hydrochloric acid (HCl, Aladdin, 36 wt% in water), (*R*)-(-)-2-Methylpiperazine (*R*-2-MP, Aladdin, 99%), (*S*)-(+)-2-Methylpiperazine (*S*-2-MP, Aladdin, 99%) are commercially available and used without further purification.

**Synthesis and crystal growth.** Synthesis of *R/S*-Zn single crystals. (*R*)-(-)-2-Methylpiperazine or (*S*)-(+)-2-Methylpiperazine (5 mmol, 0.505 g), and ZnO (5 mmol, 0.410 g) was dissolved in 4 mL of hydrochloric acid in a 20 mL reaction vial. The mixture was stirred continually to form a transparent solution. Then the resultant solution was filtered and allowed to evaporate slowly at room temperature to acquire the colorless crystals.

For the synthesis of Sb<sup>3+</sup>-doped *R/S*-Zn crystals, the same method was used. The amount of *R/S*-2-MP, and HCl aqueous solution remain unchanged, and different molar proportions (*x*mol%) of SbCl<sub>3</sub> were added to replace the original ZnO. In this work, *x* of ***R-Zn:x%Sb*** only represents the feeding level of Sb<sup>3+</sup> in the preparation process, rather than the actual proportion after crystallization.

**Characterization.** Single-crystal X-ray diffraction (SCXRD) data for all the compounds were recorded on Rigaku XtaLAB MM007 CCD diffractometer with Mo K $\alpha$  radiation ( $\lambda = 0.71073$  Å) at 100 K. The structures were solved by SHELXT methods with the Olex2 programs<sup>S1</sup> and all non-hydrogen atoms were refined anisotropically by least-squares technique on weighted  $F^2$  using SHELXL. Powder X-ray diffraction (PXRD) spectra were recorded on a Rigaku D/Max-2500 diffractometer at 40 kV, 100 mA with a Cu-target tube and a graphite monochromator. UV-vis absorbance spectra and UV-vis-NIR spectra were collected with PerkinElmer LAMBDA 750. X-ray photoelectron spectra (XPS) were carried out on a Thermo Scientific ESCALAB 250Xi with Al K $\alpha$  radiation. The binding energy was calibrated using the C 1s photoelectron peak at 284.6 eV as the reference. Thermogravimetry analyses (TGA) were performed on a standard TG-DTA analyzer under an Ar atmosphere in the temperature range 30-800 °C at a heating rate of 10 °C min<sup>-1</sup>. Edinburgh FS5 fluorescence spectrometer was applied to collect the luminescence spectra, lifetimes and quantum yields. For the time-resolved spectra at nanosecond and microsecond scales, we used a pulsed laser source (365 nm, pulse width: 897.4 ps, bandwidth: 13.9 nm) and a microsecond lamp source (10 Hz) for measurement, respectively. Instrument response function (IRF) curves were obtained via collecting the decay signals only from the excitation sources. Transmission circular dichroism (CD) spectrum of the prepared films was measured and collected using a CD spectrometer (J-1700, JASCO) with the scanning rate of 50 nm/min. The circularly polarized luminescence (CPL) spectrum was recorded on JASCO CPL-200 spectrometer. Fourier transform infrared (FTIR) spectra of the ***R/S*-Zn** and ***R-Zn:x%Sb*** were collected on FTIR spectrometer (TENSOR 37) from 4000 to 400 cm<sup>-1</sup>.

**Nonlinear optical measurements.** The nonlinear optical (NLO) measurements were conducted using a home-built multiphoton nonlinear optical microscope system. Briefly, a commercial femtosecond pump (Mai Tai HP, <100 fs, 80 MHz, wavelength ranging from 690 to 1040 nm) in reflection geometry. A laser beam is incident on the samples with an incident angle  $\gamma$  ( $\gamma = 45^\circ$ ) and the generated SHG signals are collected in the reflection configuration. The linearly polarized pump was altered with the  $\lambda/2$  plate. The measured SHG signal is reflected from the front surface of crystal and quartz. The wavelength-dependent SHG responses were collected via switching the pumped wavelengths from 800 to 1040 nm at the same incident laser power. The azimuth-polarization-dependent SHG signals have been collected at intervals of 10°. The power-dependent SHG measurements were collected upon excitation at the optimal wavelength with different laser power (the laser spot of  $\approx 20$   $\mu\text{m}$  in diameter). The Z-cut quartz is used as a benchmark for SHG signal intensity.

**DFT calculations.** DFT calculations were implemented in Vienna Ab initio Simulation Package (VASP 5.4.4) adopting the projector augmented-wave method (PAW) to deal with the ion-electron interaction<sup>S2,3</sup>. We selected the generalized gradient approximation (GGA) of Perdew-Burke-Ernzerhof (PBE) to approximate the exchange-correlation energy<sup>S4</sup>. Considering the nonbonding and long-range interaction in the hybrid organic-inorganic metal halides, the van der Waals (vdW) correction (DFT-D3) was adopted in the calculations<sup>S5</sup>. The plane-wave basis set was defined by the energy cut-off at 450 eV. The energy convergence criterion for electronic iteration was set to be 10<sup>-4</sup> eV. The structural relaxation was performed until the Hellmann-Feynman forces on each atom are less than 0.001 eV/Å. A  $\Gamma$ -centered  $4 \times 4 \times 3$  grid was adopted to simulate the k-space integrations. The DFT calculations about the Zn-Sb alloying system were based on the model, in which the three Zn<sup>2+</sup> were replaced by two Sb<sup>3+</sup> and one hole in a unit cell.

## Supplementary Figures

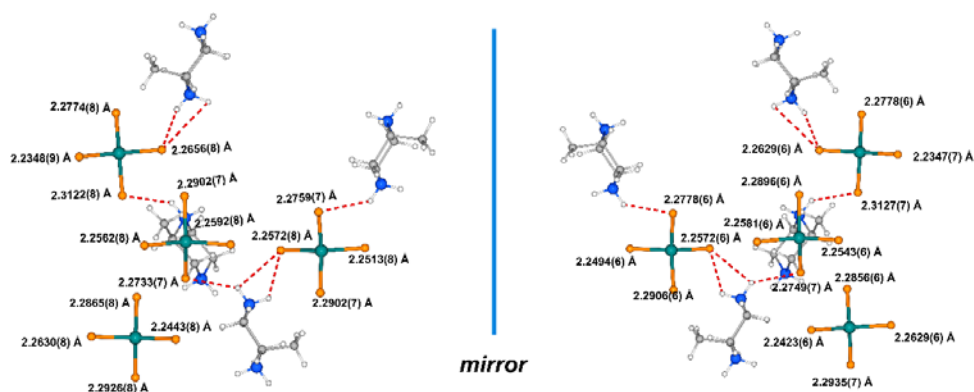

**Fig S1.** N–H...Cl–Zn hydrogen bonds (red dotted lines) and inorganic  $(\text{ZnCl}_4)^{2-}$  tetrahedrons in *R*-Zn (left) and *S*-Zn (right) crystals.

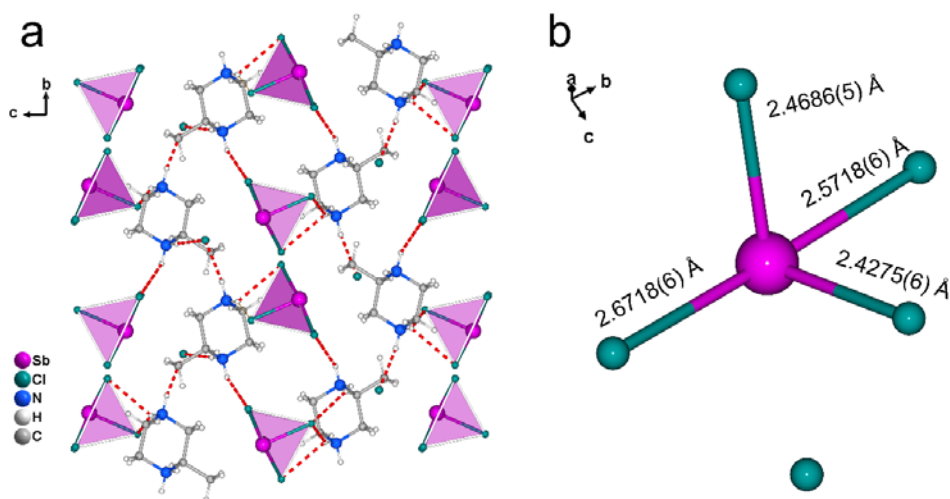

**Fig S2.** (a) Crystal packing diagram of *R*-Sb and the N–H...Cl hydrogen bonds (red dotted lines); (b) inorganic  $(\text{SbCl}_5)^{2-}$  building blocks in *R*-Sb crystals.

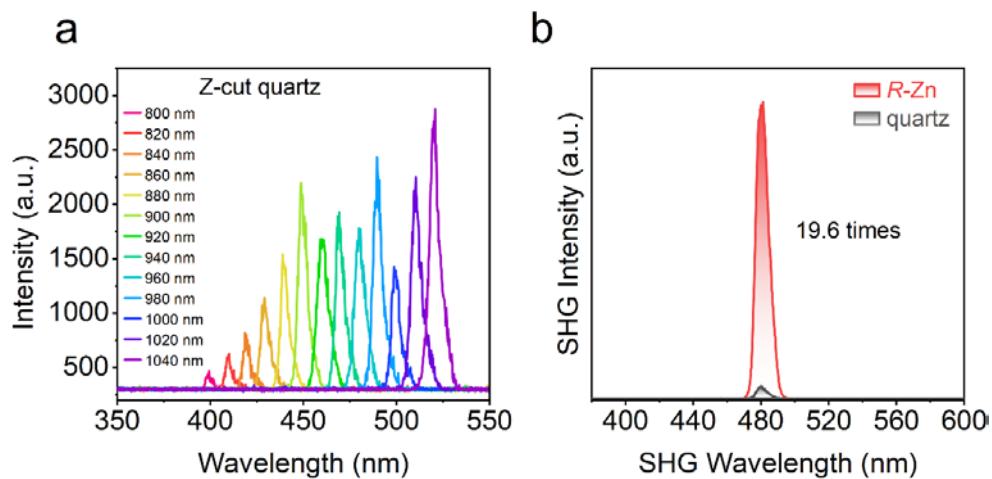

**Fig S3.** The SHG spectra of (a) Z-cut quartz and at different wavelengths. (b) Comparison of SHG intensities of *R-Zn* with that of the Z-cut quartz at 480 nm.

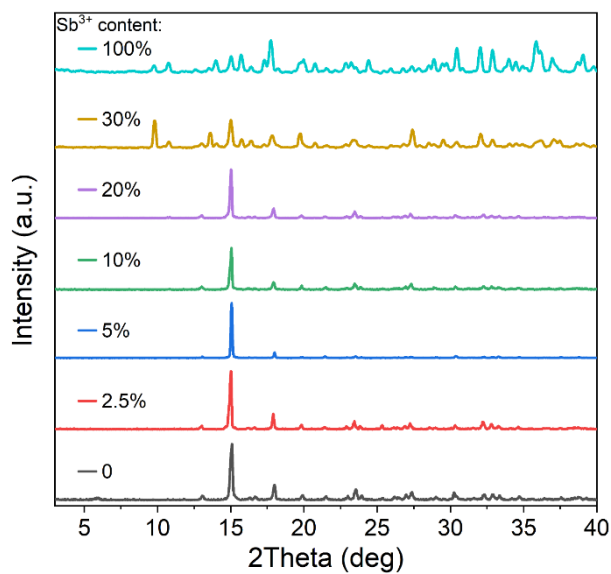

**Fig S4.** XRD patterns of the undoped and the representative Sb-doped *R-Zn* samples.

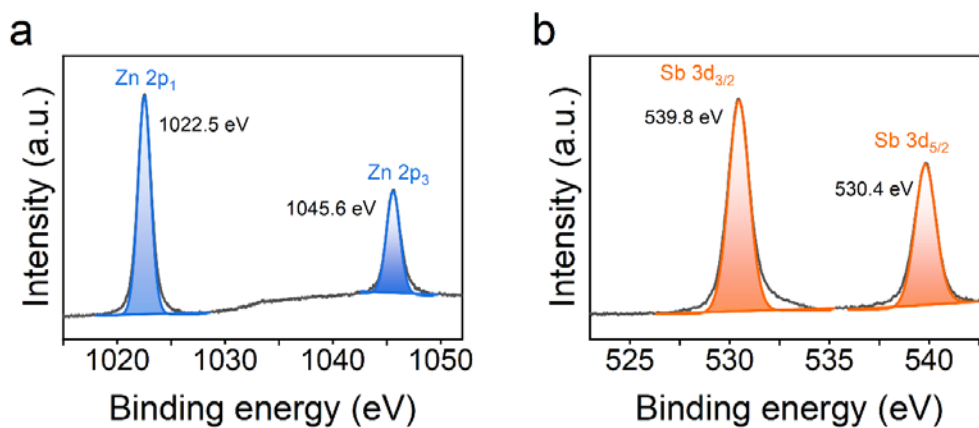

**Fig S5.** High-resolution XPS spectrum of Zn 2p and Sb 3d for *R-Zn:10%Sb*<sup>3+</sup>.

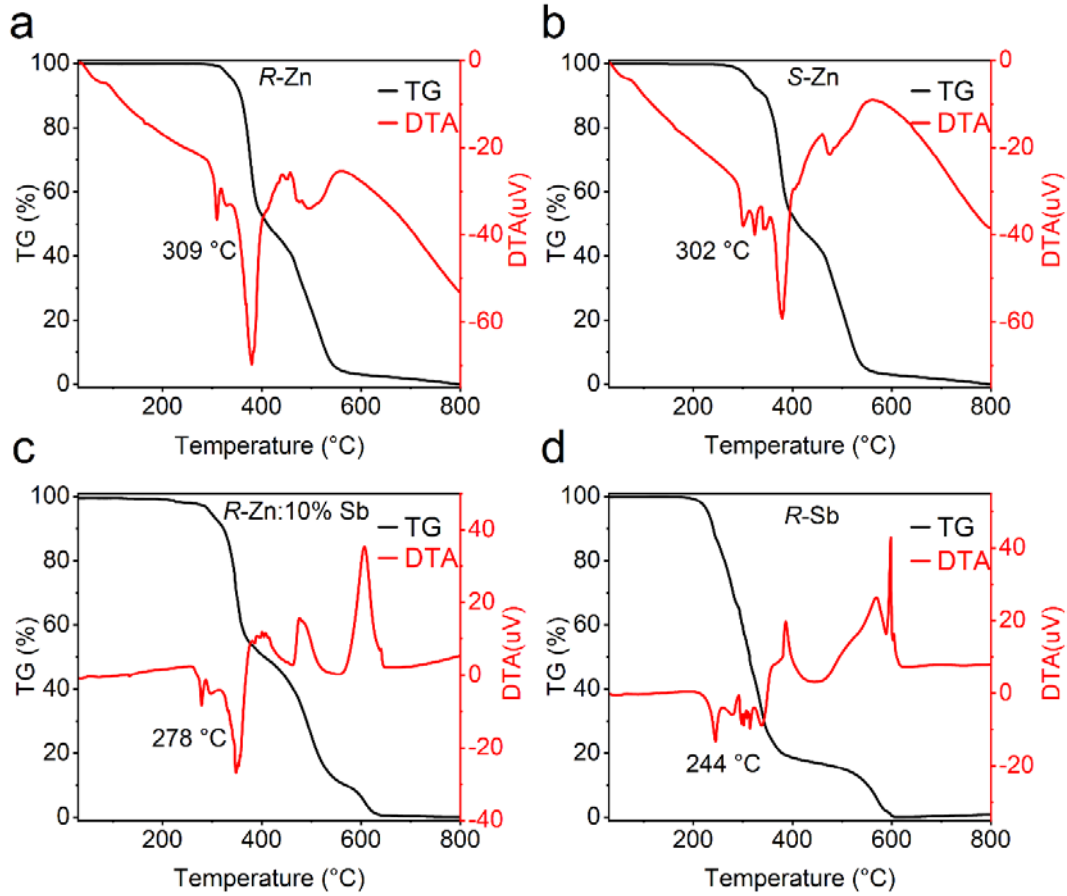

**Fig S6.** Thermogravimetric analyses (TGA) for *R-Zn*, *S-Zn*, *R-Zn:10% Sb*, and *R-Sb*.

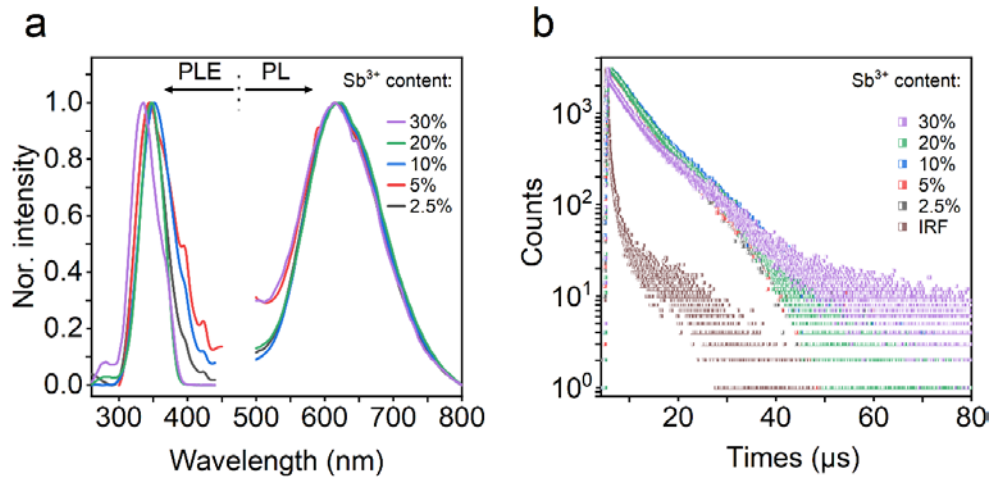

**Fig S7.** (a) Photoluminescence excitation (PLE), photoluminescence (PL) and the corresponding (b) time-resolved spectra for *R-Zn* with different  $\text{Sb}^{3+}$  doping content.

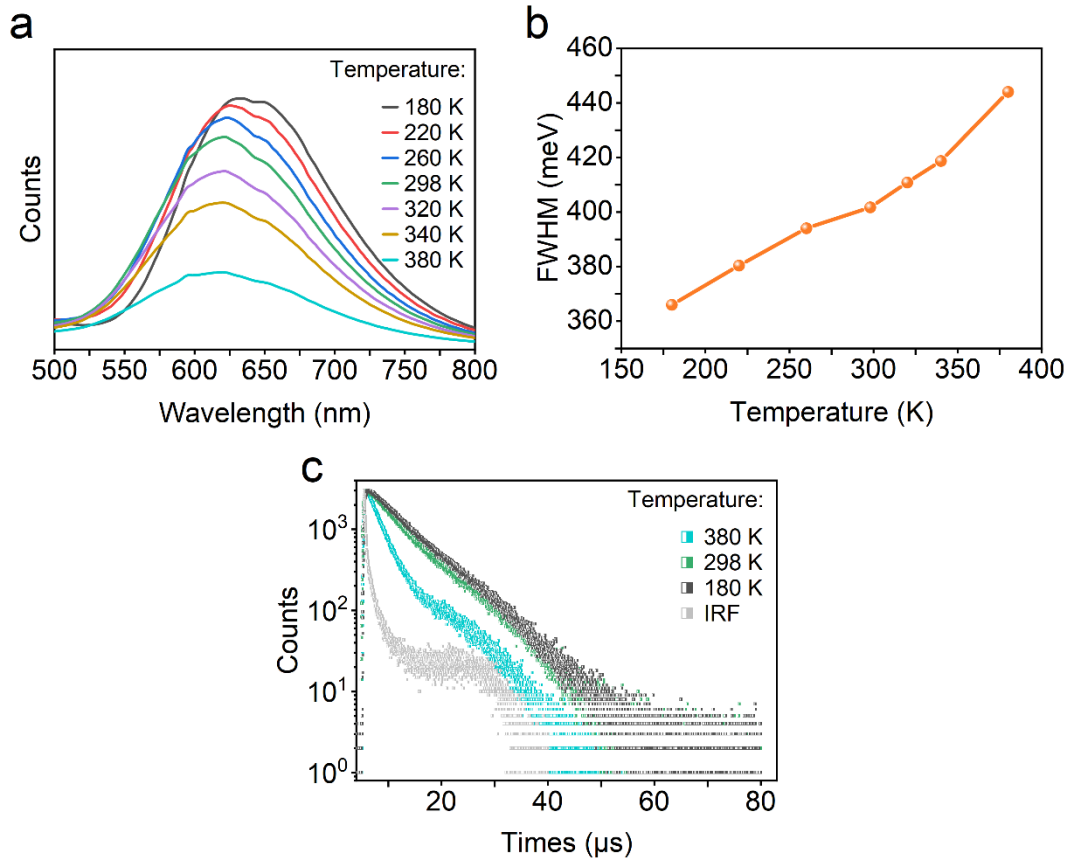

**Fig S8.** (a) Varied-temperature PL spectra of  $R\text{-Zn:10\%Sb}$  and (b) corresponding full width at half-maximum (FWHM) at the excitation of 351 nm. (c) Time-solved PL spectra of  $R\text{-Zn:10\%Sb}$  at varied temperatures.

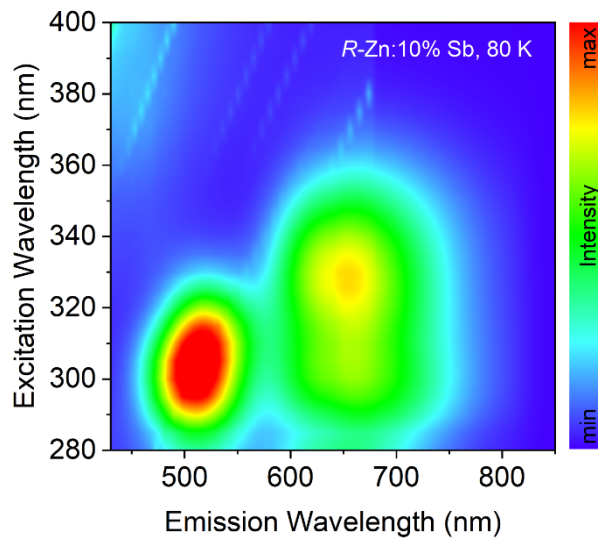

**Fig S9.** Excitation-emission mapping pattern of  $R\text{-Zn:10\%Sb}$  at 80 K.

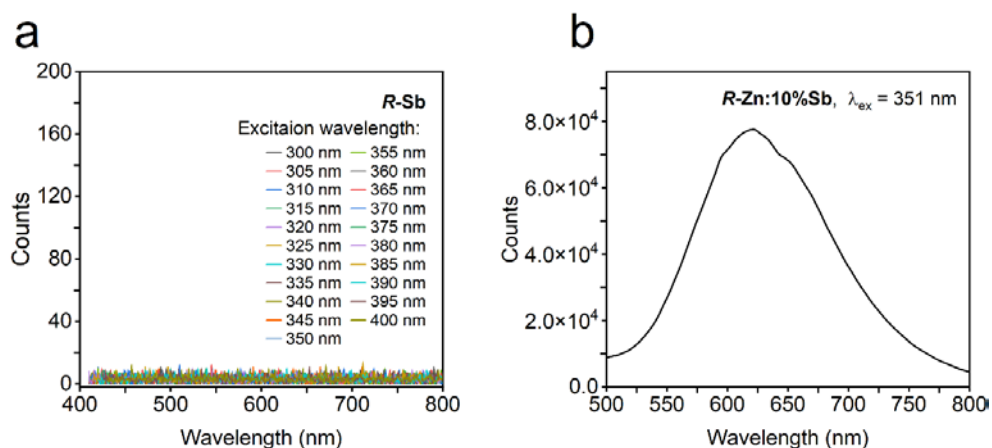

**Fig S10.** (a) Excitation-emission mapping pattern of **R-Sb** and (b) PL spectra of **R-Zn:10%Sb** at the excitation of 351 nm.

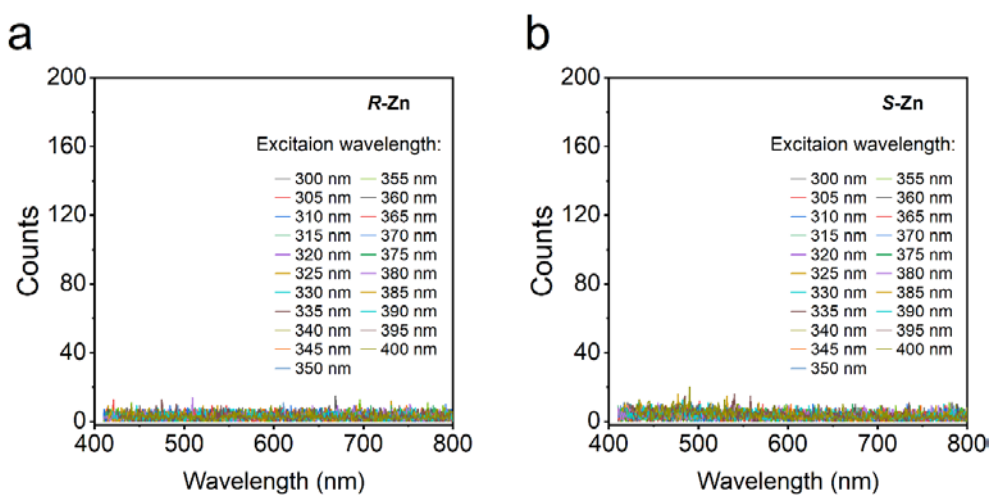

**Fig S11.** Excitation-emission mapping pattern of (a) **R-Zn** and (b) **S-Zn**.

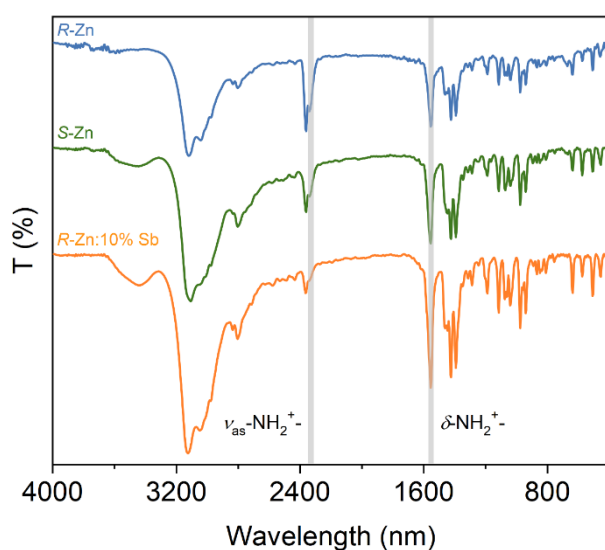

**Fig S12.** Fourier transform infrared (FTIR) spectra for **R-/S-Zn** and **R-Zn:10%Sb**.

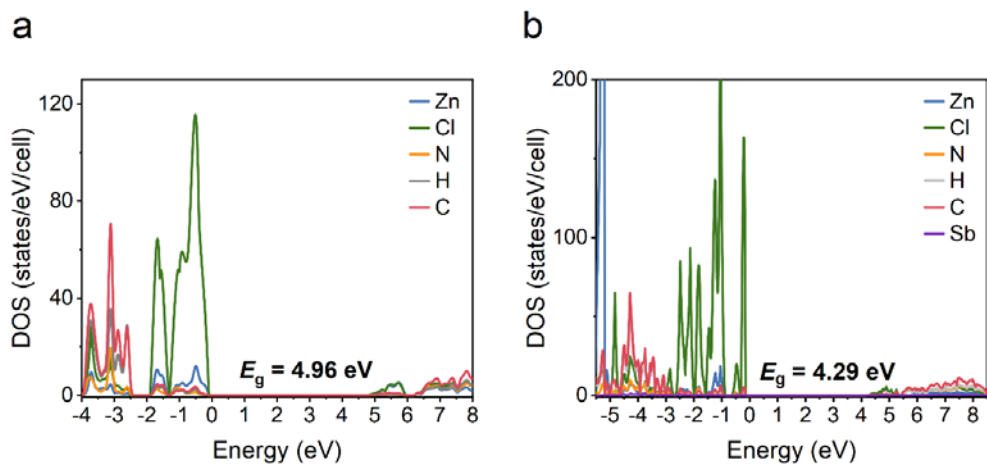

**Fig S13.** Calculated DOS plots of (a) *R-Zn* and (b) doped *R-Zn*.

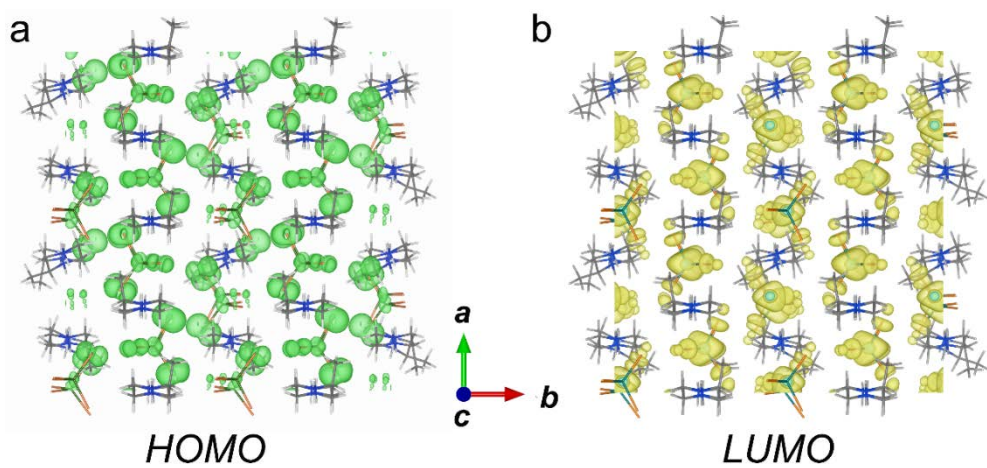

**Fig S14.** Calculated orbital nature for *R-Zn*.



## Supplementary Tables

**Table S1.** Crystallographic data and structure refinement details for **R-Zn**, **S-Zn** and **R-Sb**.

| Identification code                                   | <b>R-Zn</b>                                                                    | <b>S-Zn</b>                                                                     | <b>R-Sb</b>                                                      |
|-------------------------------------------------------|--------------------------------------------------------------------------------|---------------------------------------------------------------------------------|------------------------------------------------------------------|
| Empirical formula                                     | C <sub>10</sub> H <sub>28</sub> Cl <sub>8</sub> N <sub>4</sub> Zn <sub>2</sub> | C <sub>20</sub> H <sub>56</sub> Cl <sub>16</sub> N <sub>8</sub> Zn <sub>4</sub> | C <sub>5</sub> H <sub>14</sub> Cl <sub>5</sub> N <sub>2</sub> Sb |
| Formula weight                                        | 618.70                                                                         | 1237.545                                                                        | 401.18                                                           |
| Temperature/K                                         | 100                                                                            | 100                                                                             | 100                                                              |
| Crystal system                                        | monoclinic                                                                     | monoclinic                                                                      | orthorhombic                                                     |
| Space group                                           | <i>P</i> 2 <sub>1</sub>                                                        | <i>P</i> 2 <sub>1</sub>                                                         | <i>P</i> 2 <sub>1</sub> 2 <sub>1</sub> 2 <sub>1</sub>            |
| <i>a</i> /Å                                           | 11.6505(4)                                                                     | 11.6567(4)                                                                      | 7.6221(2)                                                        |
| <i>b</i> /Å                                           | 12.1341(4)                                                                     | 12.1248(4)                                                                      | 10.6784(2)                                                       |
| <i>c</i> /Å                                           | 16.4837(6)                                                                     | 16.4859(5)                                                                      | 16.3487(3)                                                       |
| $\alpha$ /°                                           | 90                                                                             | 90                                                                              | 90                                                               |
| $\beta$ /°                                            | 90.02(3)                                                                       | 90                                                                              | 90                                                               |
| $\gamma$ /°                                           | 90                                                                             | 90                                                                              | 90                                                               |
| Volume/Å <sup>3</sup>                                 | 2330.27(14)                                                                    | 2330.04(13)                                                                     | 1330.65(5)                                                       |
| <i>Z</i>                                              | 4                                                                              | 2                                                                               | 4                                                                |
| $\rho_{\text{calc}}/\text{cm}^3$                      | 1.764                                                                          | 1.764                                                                           | 2.003                                                            |
| $\mu/\text{mm}^{-1}$                                  | 2.979                                                                          | 2.980                                                                           | 3.041                                                            |
| F(000)                                                | 1248.0                                                                         | 1255.8                                                                          | 776.0                                                            |
| Reflections collected                                 | 28131                                                                          | 25218                                                                           | 17010                                                            |
| Data/restraints/parameters                            | 12085/1/437                                                                    | 11317/1/438                                                                     | 3823/0/119                                                       |
| Goodness-of-fit on F <sup>2</sup>                     | 0.972                                                                          | 1.024                                                                           | 1.102                                                            |
| Final R indexes [ <i>I</i> > 2 $\sigma$ ( <i>I</i> )] | R <sub>1</sub> = 0.0236, wR <sub>2</sub> = 0.0472                              | R <sub>1</sub> = 0.0258, wR <sub>2</sub> = 0.0567                               | R <sub>1</sub> = 0.0139, wR <sub>2</sub> = 0.0308                |
| Final R indexes [all data]                            | R <sub>1</sub> = 0.0271, wR <sub>2</sub> = 0.0479                              | R <sub>1</sub> = 0.0286, wR <sub>2</sub> = 0.0573                               | R <sub>1</sub> = 0.0142, wR <sub>2</sub> = 0.0310                |
| Flack parameter                                       | 0.015(5)                                                                       | -0.001(6)                                                                       | -0.013(8)                                                        |
| CCDC                                                  | 2241401                                                                        | 2241402                                                                         | 803026 <sup>S6</sup>                                             |

**Table S2.** Selected bond lengths (Å) for **R-Zn**.

| Atom | Atom | Length/Å  | Atom | Atom | Length/Å |
|------|------|-----------|------|------|----------|
| Zn1  | Cl4  | 2.2572(8) | N8   | C15  | 1.487(4) |
| Zn1  | Cl1  | 2.2902(7) | N8   | C12  | 1.489(4) |
| Zn1  | Cl2  | 2.2513(8) | N1   | C012 | 1.494(4) |
| Zn1  | Cl3  | 2.2759(7) | N1   | C2   | 1.507(4) |
| Zn4  | Cl16 | 2.2630(8) | N2   | C3   | 1.495(4) |
| Zn4  | Cl13 | 2.2926(8) | N2   | C4   | 1.485(4) |

| Atom | Atom | Length/Å  | Atom | Atom | Length/Å |
|------|------|-----------|------|------|----------|
| Zn4  | Cl14 | 2.2443(8) | N5   | C17  | 1.498(4) |
| Zn4  | Cl15 | 2.2865(8) | N5   | C18  | 1.488(4) |
| Zn2  | Cl8  | 2.2562(8) | N7   | C14  | 1.496(4) |
| Zn2  | Cl6  | 2.2592(8) | N7   | C13  | 1.498(4) |
| Zn2  | Cl7  | 2.2895(7) | C14  | C15  | 1.514(4) |
| Zn2  | Cl5  | 2.2733(7) | C20  | C17  | 1.526(4) |
| Zn3  | Cl10 | 2.2656(8) | C20  | C16  | 1.514(4) |
| Zn3  | Cl11 | 2.2774(8) | C7   | C6   | 1.518(4) |
| Zn3  | Cl9  | 2.3122(8) | C7   | C8   | 1.517(4) |
| Zn3  | Cl12 | 2.2348(9) | C18  | C19  | 1.512(4) |
| N3   | C8   | 1.492(4)  | C10  | C9   | 1.504(4) |
| N3   | C9   | 1.501(4)  | C12  | C4   | 1.520(4) |
| N6   | C20  | 1.515(4)  | C3   | C2   | 1.518(5) |
| N6   | C19  | 1.496(4)  | C12  | C13  | 1.516(4) |
| N6   | C19  | 1.496(4)  | C12  | C13  | 1.516(4) |
| N4   | C7   | 1.510(3)  | C2   | C1   | 1.516(4) |
| N4   | C10  | 1.494(4)  | C13  | C11  | 1.514(4) |

**Table S3.** Selected bond angles (°) for **R-Zn**.

| Atom | Atom | Atom | Angle/°   | Atom | Atom | Atom | Angle/°  |
|------|------|------|-----------|------|------|------|----------|
| Cl4  | Zn1  | Cl1  | 108.24(3) | C12  | N1   | C2   | 114.9(2) |
| Cl4  | Zn1  | Cl3  | 107.93(3) | C4   | N2   | C3   | 111.0(2) |
| Cl2  | Zn1  | Cl4  | 116.34(3) | C18  | N5   | C17  | 112.0(2) |
| Cl2  | Zn1  | Cl1  | 109.50(3) | C14  | N7   | C13  | 111.1(2) |
| Cl2  | Zn1  | Cl3  | 107.45(3) | N7   | C14  | C15  | 110.7(3) |

| Atom | Atom | Atom | Angle/°   | Atom | Atom | Atom | Angle/°  |
|------|------|------|-----------|------|------|------|----------|
| Cl3  | Zn1  | Cl1  | 107.01(3) | N8   | C15  | C14  | 111.2(2) |
| Cl16 | Zn4  | Cl13 | 107.87(3) | N6   | C20  | C17  | 108.5(2) |
| Cl16 | Zn4  | Cl15 | 106.09(3) | C16  | C20  | N6   | 111.2(2) |
| Cl14 | Zn4  | Cl16 | 117.05(3) | C16  | C20  | C17  | 114.2(3) |
| Cl14 | Zn4  | Cl13 | 109.41(3) | N4   | C7   | C6   | 111.9(2) |
| Cl14 | Zn4  | Cl15 | 109.95(3) | N4   | C7   | C8   | 109.1(2) |
| Cl15 | Zn4  | Cl13 | 105.87(3) | C8   | C7   | C6   | 113.0(3) |
| Cl8  | Zn2  | Cl6  | 120.70(3) | N5   | C17  | C20  | 111.9(2) |
| Cl8  | Zn2  | Cl7  | 106.11(3) | N5   | C18  | C19  | 110.4(2) |
| Cl8  | Zn2  | Cl5  | 108.21(3) | N6   | C19  | C18  | 110.9(2) |
| Cl6  | Zn2  | Cl7  | 105.16(3) | N4   | C10  | C9   | 110.3(2) |
| Cl6  | Zn2  | Cl5  | 104.99(3) | N1   | C12  | C4   | 110.8(3) |
| Cl5  | Zn2  | Cl7  | 111.67(3) | N2   | C3   | C2   | 112.3(3) |
| Cl10 | Zn3  | Cl11 | 107.77(3) | N8   | C12  | C13  | 110.2(2) |
| Cl10 | Zn3  | Cl9  | 106.32(3) | N3   | C8   | C7   | 111.5(2) |
| Cl11 | Zn3  | Cl9  | 109.99(3) | N2   | C4   | C12  | 109.8(2) |
| Cl12 | Zn3  | Cl10 | 114.04(3) | N3   | C9   | C10  | 110.6(2) |
| Cl12 | Zn3  | Cl11 | 110.68(3) | N1   | C2   | C3   | 109.1(3) |
| Cl12 | Zn3  | Cl9  | 107.92(3) | N1   | C2   | C1   | 111.8(3) |
| C8   | N3   | C9   | 111.6(2)  | C1   | C2   | C3   | 113.6(3) |
| C19  | N6   | C20  | 114.1(2)  | N7   | C13  | C12  | 109.1(2) |
| C10  | N4   | C7   | 114.1(2)  | N7   | C13  | C11  | 110.6(3) |
| C15  | N8   | C12  | 111.7(2)  | C11  | C13  | C12  | 111.7(3) |

**Table S4.** Selected bond lengths (Å) for *S-Zn*.

| Atom | Atom | Length/Å  | Atom | Atom | Length/Å |
|------|------|-----------|------|------|----------|
| Zn2  | C15  | 2.2581(6) | N3   | C19  | 1.493(3) |
| Zn2  | C17  | 2.2543(6) | N3   | C18  | 1.503(4) |
| Zn2  | C16  | 2.2749(7) | N1   | C5   | 1.496(4) |
| Zn2  | C18  | 2.2906(6) | N1   | C2   | 1.511(4) |
| Zn3  | C19  | 2.2423(6) | N5   | C15  | 1.499(3) |
| Zn3  | C113 | 2.2856(6) | N5   | C12  | 1.499(3) |
| Zn3  | C112 | 2.2629(6) | N6   | C14  | 1.488(3) |
| Zn3  | C110 | 2.2935(7) | N6   | C13  | 1.485(3) |
| Zn1  | C111 | 2.2896(6) | N7   | C9   | 1.502(3) |
| Zn1  | C11  | 2.2494(6) | N7   | C8   | 1.494(3) |
| Zn1  | C14  | 2.2778(6) | C15  | C14  | 1.511(4) |
| Zn1  | C13  | 2.2572(6) | C5   | C4   | 1.518(4) |
| Zn4  | C114 | 2.2628(6) | C7   | C6   | 1.518(4) |
| Zn4  | C117 | 2.2784(7) | C7   | C8   | 1.521(3) |
| Zn4  | C115 | 2.3127(7) | C10  | C9   | 1.508(4) |
| Zn4  | C116 | 2.2347(7) | C19  | C20  | 1.514(3) |
| N8   | C7   | 1.509(3)  | C13  | C12  | 1.526(4) |
| N8   | C10  | 1.497(3)  | C17  | C16  | 1.516(4) |
| N4   | C17  | 1.519(3)  | C17  | C18  | 1.526(4) |
| N4   | C20  | 1.497(4)  | C2   | C3   | 1.518(4) |
| N2   | C4   | 1.493(3)  | C2   | C1   | 1.510(4) |
| N2   | C3   | 1.490(4)  | C12  | C11  | 1.510(4) |

**Table S5.** Selected bond angles (°) for *S-Zn*.

| Atom | Atom | Atom | Angle/°   | Atom | Atom | Atom | Angle/°    |
|------|------|------|-----------|------|------|------|------------|
| C17  | Zn2  | C15  | 120.69(3) | C2   | N1   | C5   | 114.4(2)   |
| C16  | Zn2  | C15  | 105.00(2) | C12  | N5   | C15  | 111.1(2)   |
| C16  | Zn2  | C17  | 108.20(2) | C13  | N6   | C14  | 112.0(2)   |
| C18  | Zn2  | C15  | 105.17(2) | C8   | N7   | C9   | 111.55(19) |
| C18  | Zn2  | C17  | 106.15(2) | C14  | C15  | N5   | 110.5(2)   |
| C18  | Zn2  | C16  | 111.64(3) | C4   | C5   | N1   | 110.8(2)   |
| C113 | Zn3  | C19  | 109.97(2) | C15  | C14  | N6   | 110.9(2)   |
| C112 | Zn3  | C19  | 116.98(3) | C6   | C7   | N8   | 111.7(2)   |
| C112 | Zn3  | C113 | 106.15(2) | C8   | C7   | N8   | 109.1(2)   |
| C110 | Zn3  | C19  | 109.41(2) | C8   | C7   | C6   | 113.4(2)   |
| C110 | Zn3  | C113 | 105.83(3) | C9   | C10  | N8   | 109.8(2)   |
| C110 | Zn3  | C112 | 107.92(2) | C20  | C19  | N3   | 110.4(2)   |
| C11  | Zn1  | C111 | 109.51(2) | C12  | C13  | N6   | 110.0(2)   |
| C14  | Zn1  | C111 | 106.98(3) | C16  | C17  | N4   | 111.2(2)   |
| C14  | Zn1  | C11  | 107.54(3) | C18  | C17  | N4   | 108.5(2)   |
| C13  | Zn1  | C111 | 108.24(2) | C18  | C17  | C16  | 114.3(2)   |
| C13  | Zn1  | C11  | 116.23(3) | C5   | C4   | N2   | 109.6(2)   |
| C13  | Zn1  | C14  | 107.96(2) | C10  | C9   | N7   | 110.6(2)   |
| C117 | Zn4  | C114 | 107.73(2) | C3   | C2   | N1   | 109.5(2)   |
| C115 | Zn4  | C114 | 106.35(2) | C1   | C2   | N1   | 111.6(2)   |
| C115 | Zn4  | C117 | 110.00(3) | C1   | C2   | C3   | 114.3(2)   |
| C116 | Zn4  | C114 | 113.99(3) | C19  | C20  | N4   | 110.6(2)   |
| C116 | Zn4  | C117 | 110.67(3) | C2   | C3   | N2   | 111.5(2)   |
| C116 | Zn4  | C115 | 107.98(3) | C7   | C8   | N7   | 111.0(2)   |

| Atom | Atom | Atom | Angle/°    | Atom | Atom | Atom | Angle/°  |
|------|------|------|------------|------|------|------|----------|
| C10  | N8   | C7   | 114.41(19) | C17  | C18  | N3   | 111.8(2) |
| C20  | N4   | C17  | 114.1(2)   | C13  | C12  | N5   | 108.6(2) |
| C3   | N2   | C4   | 111.3(2)   | C11  | C12  | N5   | 110.7(2) |
| C18  | N3   | C19  | 111.9(2)   | C11  | C12  | C13  | 111.2(2) |

**Table S6.** Crystal data and structure refinement for CCDC 803026 and **R-Sb**.

| Identification                                | Reported                                                         | This work ( <b>R-Sb</b> )                                        |
|-----------------------------------------------|------------------------------------------------------------------|------------------------------------------------------------------|
| Empirical formula                             | C <sub>5</sub> H <sub>14</sub> Cl <sub>5</sub> N <sub>2</sub> Sb | C <sub>5</sub> H <sub>14</sub> Cl <sub>5</sub> N <sub>2</sub> Sb |
| CCDC                                          | 803026                                                           |                                                                  |
| Formula weight                                | 401.18                                                           | 401.18                                                           |
| Temperature (K)                               | 293(2)                                                           | 100                                                              |
| Crystal system                                | orthorhombic                                                     | orthorhombic                                                     |
| Space group                                   | <i>P</i> 2 <sub>1</sub> 2 <sub>1</sub> 2 <sub>1</sub>            | <i>P</i> 2 <sub>1</sub> 2 <sub>1</sub> 2 <sub>1</sub>            |
| a (Å)                                         | 7.745(5)                                                         | 7.6221(2)                                                        |
| b (Å)                                         | 10.773(7)                                                        | 10.6784(2)                                                       |
| c (Å)                                         | 16.318(9)                                                        | 16.3487(3)                                                       |
| α (°)                                         | 90.00                                                            | 90                                                               |
| β (°)                                         | 90.00                                                            | 90                                                               |
| γ (°)                                         | 90.00                                                            | 90                                                               |
| V (Å <sup>3</sup> )                           | 1361.6(14)                                                       | 1330.65(5)                                                       |
| Z                                             | 4                                                                | 4                                                                |
| ρ (calculated) (g/cm <sup>3</sup> )           | 1.957                                                            | 2.003                                                            |
| F(000)                                        | 776.0                                                            | 776.0                                                            |
| Final R indexes [ <i>I</i> ≥ 2σ ( <i>I</i> )] | R <sub>1</sub> = 0.0190, wR <sub>2</sub> = 0.0414                | R <sub>1</sub> = 0.0139, wR <sub>2</sub> = 0.0308                |
| Final R indexes [all data]                    | R <sub>1</sub> = 0.0198, wR <sub>2</sub> = 0.0417                | R <sub>1</sub> = 0.0142, wR <sub>2</sub> = 0.0310                |
| Goodness-of-fit on F <sup>2</sup>             | 1.081                                                            | 1.102                                                            |
| Flack parameter                               | -0.037(17)                                                       | -0.013(8)                                                        |

**Table S7.** The comparison of Sb-Cl bond lengths and Cl-Sb-Cl angles of CCDC 803026 and **R-Sb**.

| Identification   | Reported   | This work ( <b>R-Sb</b> ) |
|------------------|------------|---------------------------|
| Bond lengths (Å) |            |                           |
| Sb1-Cl1          | 2.5667(13) | 2.5718(6)                 |
| Sb1-Cl2          | 2.4351(12) | 2.4275(6)                 |
| Sb1-Cl3          | 2.4702(14) | 2.4686(5)                 |
| Sb1-Cl4          | 2.6932(13) | 2.6718(6)                 |
| Bond angles (°)  |            |                           |
| Cl1-Sb1-Cl4      | 176.26(3)  | 175.865(18)               |
| Cl2-Sb1-Cl1      | 89.95(5)   | 89.777(17)                |
| Cl2-Sb1-Cl3      | 89.51(4)   | 89.619(19)                |
| Cl2-Sb1-Cl4      | 88.38(5)   | 88.062(18)                |
| Cl3-Sb1-Cl1      | 89.02(4)   | 88.819(18)                |
| Cl3-Sb1-Cl4      | 87.62(4)   | 87.642(18)                |

## Reference

- S1 O. V. Dolomanov, L. J. Bourhis, R. J. Gildea, J. A. K. Howard and H. Puschmann, *J. Appl. Crystallogr.*, 2009, **42**, 339-341.
- S2 G. Kresse and J. Furthmüller, *Physical Review B*, 1996, **54**, 11169-11186.
- S3 G. Kresse and D. Joubert, *Physical Review B*, 1999, **59**, 1758-1775.
- S4 J. P. Perdew, K. Burke and M. Ernzerhof, *Phys. Rev. Lett.*, 1996, **77**, 3865-3868.
- S5 J. Klimeš, D. R. Bowler and A. Michaelides, *Physical Review B*, 2011, **83**, 195131.
- S6 L. Li and G.-X. Wang, *Acta. Crystallogr. E.*, 2010, **66**, m1629.
